# Supplementary material for: Sleep in Myopic and Non-Myopic Children
Source: PubMed Central journal article supplement — Transl Vis Sci Technol. 2020 Aug 12;9(9):22. doi: 10.1167/tvst.9.9.22 (PMC7442863; doi:10.1167/tvst.9.9.22), 2020-08-12

Supplemental Figure 1: Example actograms for weekdays and weekends over warmer and cooler seasons for a representative myopic child (A) and a non-myopic child (B). Yellow lines depict light exposure, black bars depict physical activity; blue shading indicates sleep, and green shading rest.

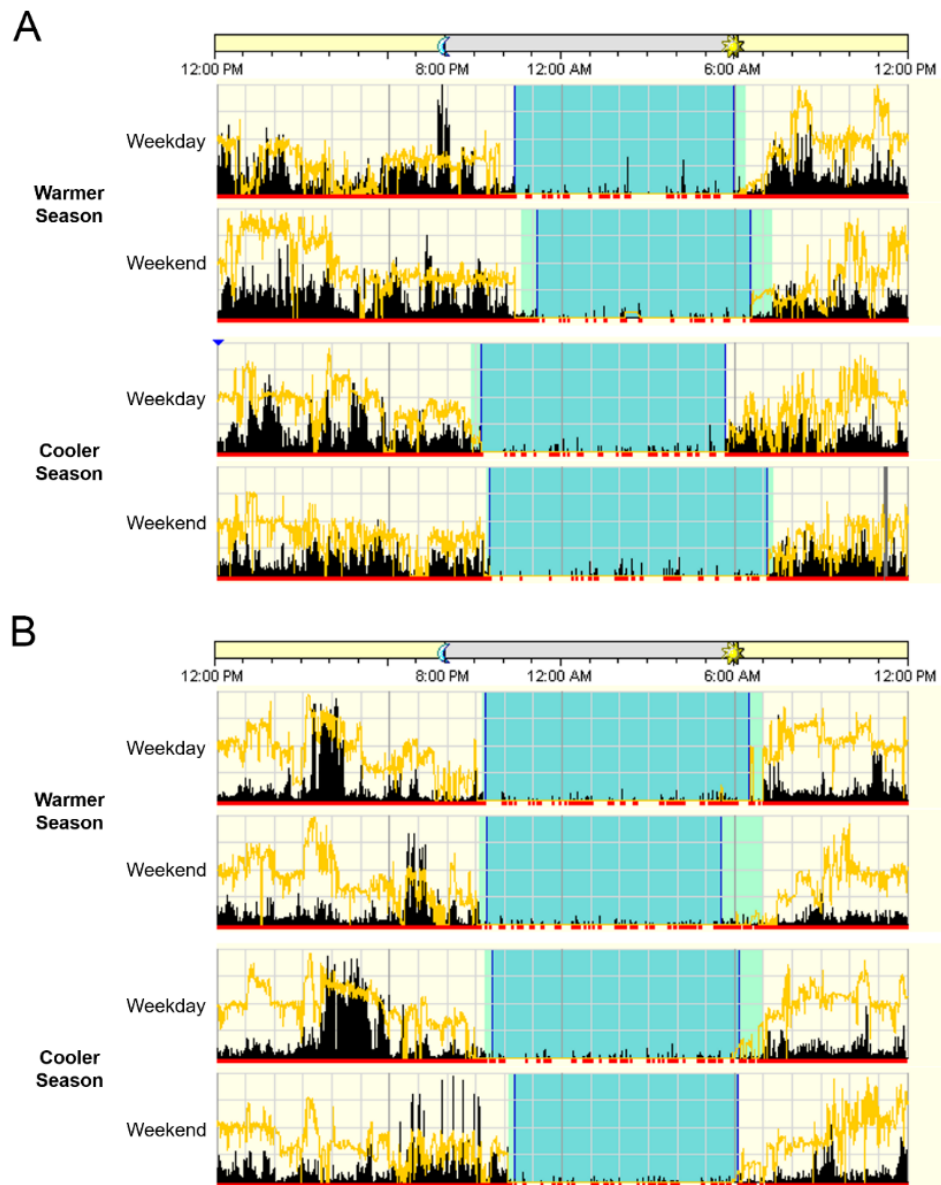

Supplement: tvst-9-9-22_s001.pdf [file tvst-9-9-22_s001.pdf]
